# Supplementary material for: Tranexamic acid in bleeding trauma patients: an exploration of benefits and harms
Source: Springer Nature journal article supplement (doi:10.1186/s13063-016-1750-1), 2017-01-31

# Interaction with time since injury and G.C.S

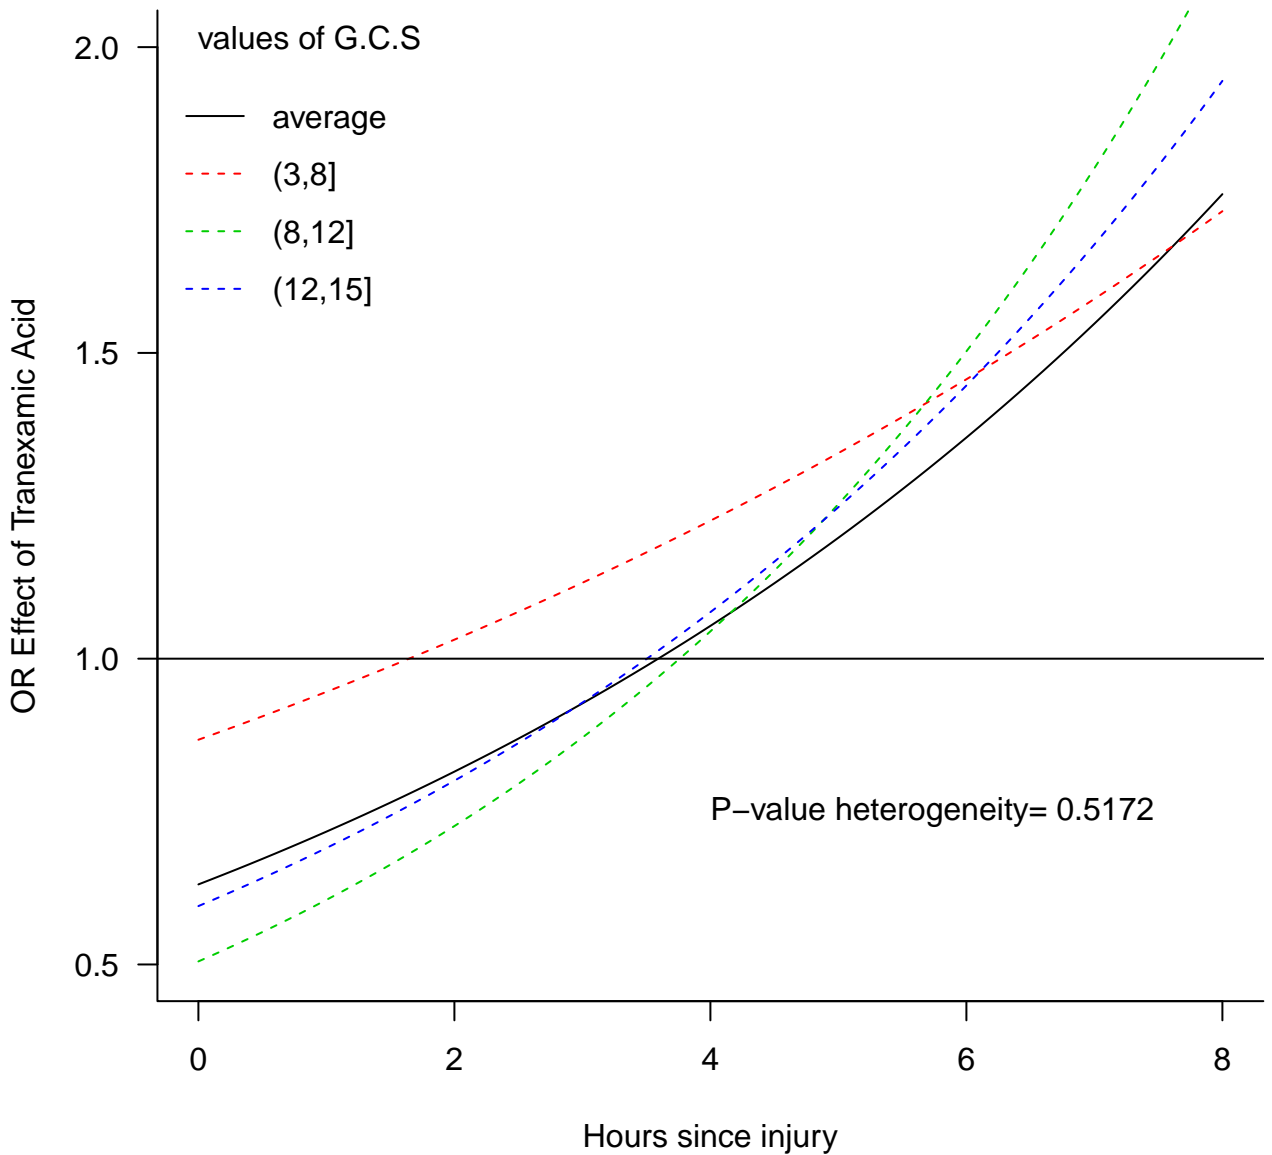

Supplement: MOESM2 [file 12030132]
