# Supplementary material for: Tranexamic acid in bleeding trauma patients: an exploration of benefits and harms
Source: Springer Nature journal article supplement (doi:10.1186/s13063-016-1750-1), 2017-01-31

# Interaction with time since injury and SBP (mmHg)

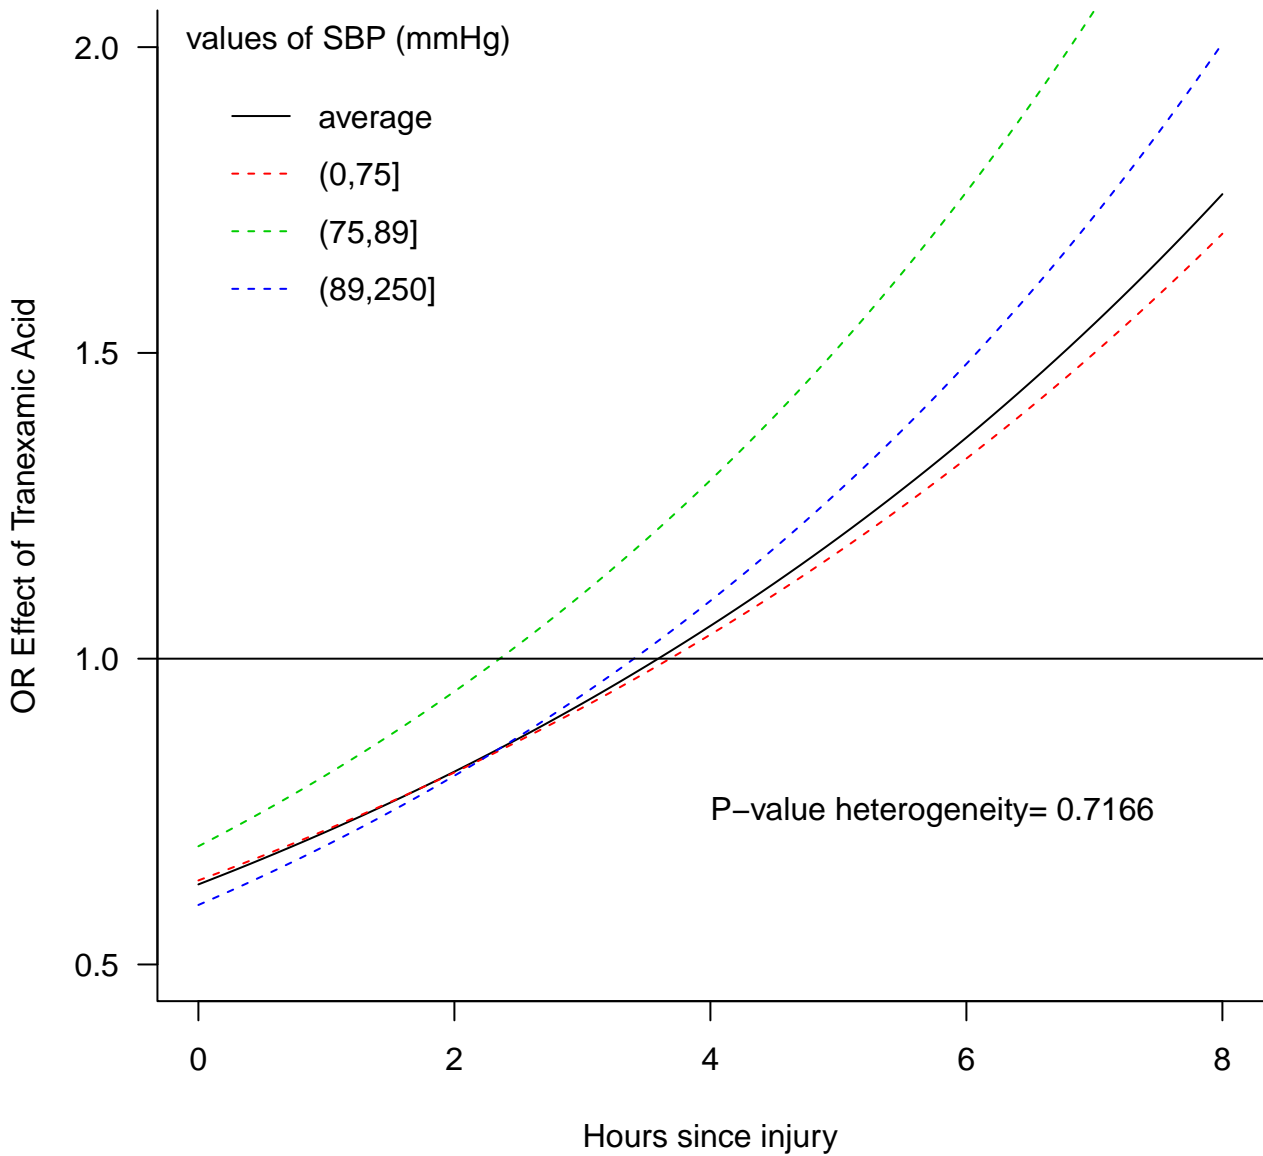

Supplement: MOESM3 [file 12030132]
